# Supplementary material
Source: MDPI journal article supplement (https://www.mdpi.com/2071-1050/12/3/997)
Supplement: s1 [file s1]

Showcasing relationships between neighborhood design and Wellbeing Toronto indicators

## SUSTAINABILITY

### **Richard R. Shaker, PhD**

Department of Geography & Environmental Studies, Graduate Programs in Environmental Applied Science & Management, Graduate Program in Spatial Analysis, Ryerson University  
Toronto, Ontario, Canada  
GeoEco Design, Syracuse, NY, USA

### **Joseph Aversa, PhD**

Department of Geography & Environmental Studies, Graduate Program in Spatial Analysis, Ryerson University Toronto, Ontario, Canada

### **Victoria Papp, MSc**

MSc. Program in Environmental Applied Science & Management, Ryerson University Toronto, Ontario, Canada

### **Bryant M. Serre**

Undergraduate Program in Environmental and Urban Sustainability, Department of Geography & Environmental Studies, Ryerson University Toronto, Ontario, Canada

### **Brian R. Mackay, MSA**

Ph.D. Program in Environmental Applied Science & Management, Graduate Program in Spatial Analysis, Ryerson University Toronto, Ontario, Canada

**Data S1: Three data items from study zip filed: 1) master file of all raw FRAGSTATS fragmentation metrics in CSV format; 2) master file of all raw FRAGSTATS fragmentation metrics in GIS shapefile format; and 3) source FRATSTATS document file.**

Richard Ross Shaker  
JOR 618A  
Ryerson University  
Toronto, Ontario, Canada  
[rshaker@ryerson.ca](mailto:rshaker@ryerson.ca)

### **Contents:**

DataS1\_2007\_TO\_MASTER\_FRAG\_STATS\_N140.csv  
DataS1\_2007\_TO\_MASTER\_FRAG\_STATS\_GIS\_Shapefile\_N140  
DataS1\_TO\_2007\_fragments\_Winter2018.fca

### **Instructions:**

The databases created for this study can be used freely with citation.
