# Supplementary material
Source: MDPI journal article supplement (https://www.mdpi.com/2071-1050/12/3/997)
Supplement: s1 [file s1]

Showcasing relationships between neighborhood design and Wellbeing Toronto indicators

## SUSTAINABILITY

### **Richard R. Shaker, PhD**

Department of Geography & Environmental Studies, Graduate Programs in Environmental Applied Science & Management, Graduate Program in Spatial Analysis, Ryerson University  
Toronto, Ontario, Canada  
GeoEco Design, Syracuse, NY, USA

### **Joseph Aversa, PhD**

Department of Geography & Environmental Studies, Graduate Program in Spatial Analysis, Ryerson University Toronto, Ontario, Canada

### **Victoria Papp, MSc**

MSc. Program in Environmental Applied Science & Management, Ryerson University Toronto, Ontario, Canada

### **Bryant M. Serre**

Undergraduate Program in Environmental and Urban Sustainability, Department of Geography & Environmental Studies, Ryerson University Toronto, Ontario, Canada

### **Brian R. Mackay, MSA**

Ph.D. Program in Environmental Applied Science & Management, Graduate Program in Spatial Analysis, Ryerson University Toronto, Ontario, Canada

## **Data S2: CSV file of non-transformed landscape class configuration COHESION, landscape diversity SHDI, and four normalized and transformed Wellbeing Toronto indicators database ( $n = 140$ )**

Richard Ross Shaker  
JOR 618A  
Ryerson University  
Toronto, Ontario, Canada  
[rshaker@ryerson.ca](mailto:rshaker@ryerson.ca)

### **Contents:**

DataS2\_TO\_COHESION\_SHDI\_4Indicators\_12Dec2019\_n140.csv

### **Instructions:**

The database created for this study can be used freely with citation.
